# Supplementary material for: Caulerpa lentillifera (Sea Grapes) Improves Cardiovascular and Metabolic Health of Rats with Diet-Induced Metabolic Syndrome
Source: PubMed Central journal article supplement (PMC7762211; doi:10.3390/metabo10120500), 2020-12-07
Supplement: metabolites-10-00500-s001.pdf [file metabolites-10-00500-s001.pdf]

Article

# *Caulerpa lentillifera* (Sea Grapes) Improves Cardiovascular and Metabolic Health of Rats with Diet-Induced Metabolic Syndrome

Ryan du Preez <sup>1,†</sup>, Marwan E. Majzoub <sup>2,3</sup>, Torsten Thomas <sup>2,3</sup>, Sunil K. Panchal <sup>1,‡</sup> and Lindsay Brown <sup>1,4,\*</sup>

<sup>1</sup> Functional Foods Research Group, University of Southern Queensland, Toowoomba QLD 4350, Australia; r.dupreez@cqu.edu.au (R.d.P.); S.Panchal@westernsydney.edu.au (S.K.P.)

<sup>2</sup> Centre for Marine Science and Innovation, University of New South Wales, Sydney NSW 2052, Australia; m.majzoub@unsw.edu.au (M.E.M.); t.thomas@unsw.edu.au (T.T.)

<sup>3</sup> School of Biological, Earth and Environmental Sciences, University of New South Wales, Sydney NSW 2052, Australia

<sup>4</sup> School of Health and Wellbeing, University of Southern Queensland, Ipswich QLD 4305, Australia

<sup>†</sup> School of Health, Medical and Applied Sciences, Central Queensland University, Rockhampton QLD 4701, Australia

<sup>‡</sup> School of Science, Western Sydney University, Richmond NSW 2753, Australia

\* Correspondence: Lindsay.Brown@usq.edu.au; Tel.: +61-7-3812-6366

Received: 12 October 2020; Accepted: 3 December 2020; Published: date

## Supplementary Figures

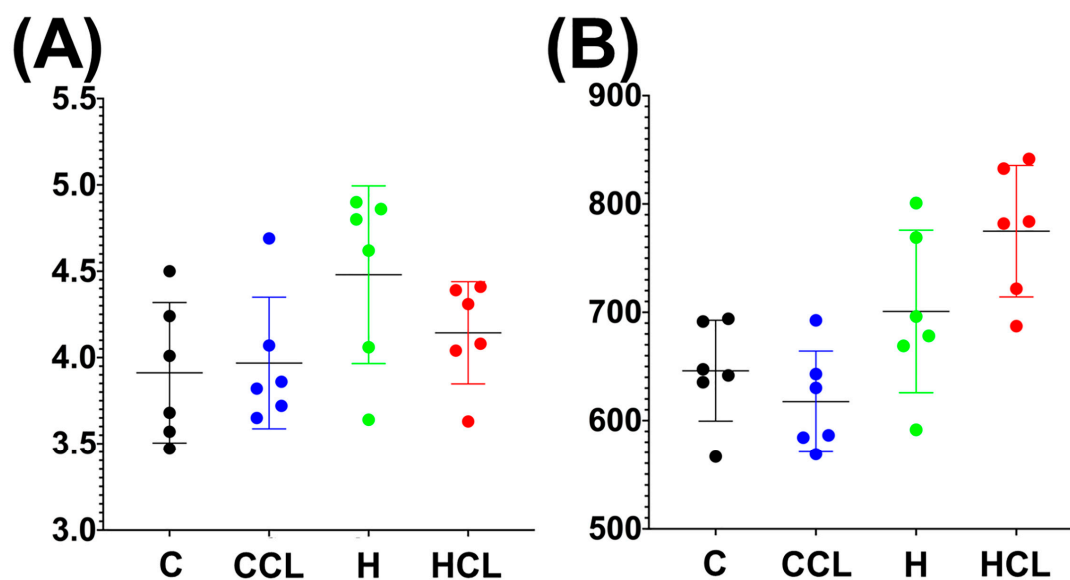

**Figure S1.** Shannon diversity (A) and richness (B) of faecal samples. C, corn starch diet-fed rats; CCL, corn starch diet-fed rats supplemented with *Caulerpa lentillifera*; H, high-carbohydrate, high-fat diet-fed rats; HCL, high-carbohydrate, high-fat diet-fed rats supplemented with *Caulerpa lentillifera*.

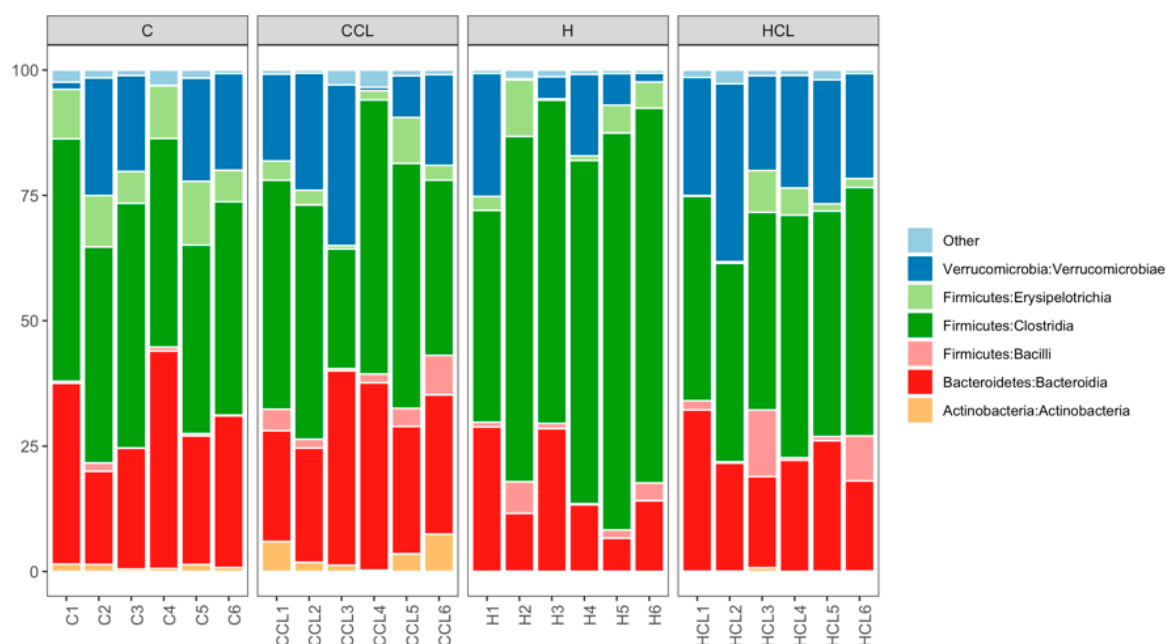

**Figure S2.** Taxonomic profiles of bacterial communities shown at the class level of all faecal samples. C, corn starch diet-fed rats; CCL, corn starch diet-fed rats supplemented with *Caulerpa lentillifera*; H, high-carbohydrate, high-fat diet-fed rats; and HCL, high-carbohydrate, high-fat diet-fed rats supplemented with *Caulerpa lentillifera*.

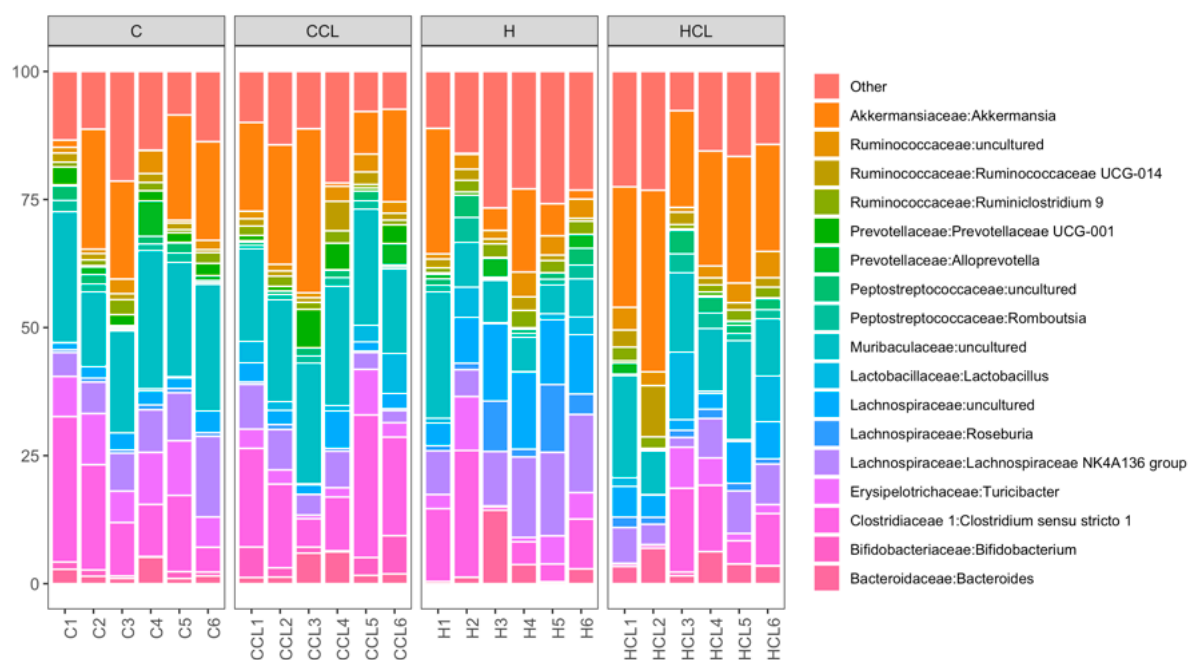

**Figure S3.** Taxonomic profiles of bacterial communities shown at the genus level of all faecal samples. C, corn starch diet-fed rats; CCL, corn starch diet-fed rats supplemented with *Caulerpa lentillifera*; H, high-carbohydrate, high-fat diet-fed rats; HCL, high-carbohydrate, high-fat diet-fed rats supplemented with *Caulerpa lentillifera*.

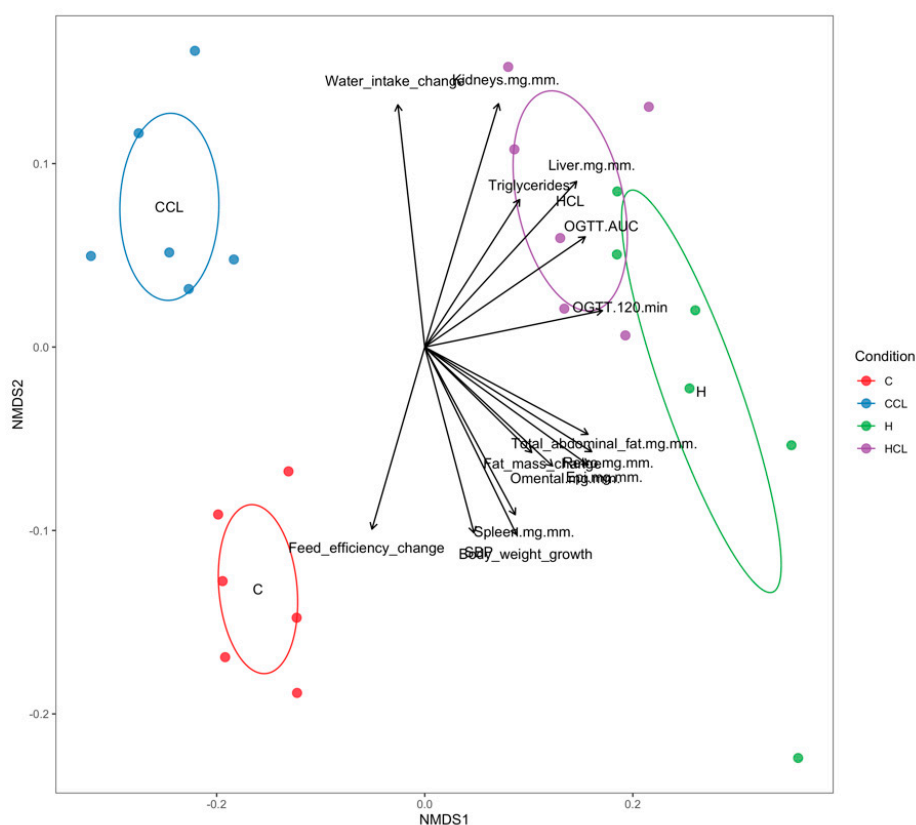

**Figure S4.** Correlation between bacterial community structure (points) and environmental variables (arrows). C, corn starch diet-fed rats; CCL, corn starch diet-fed rats supplemented with *Caulerpa lentillifera*; H, high-carbohydrate, high-fat diet-fed rats; HCL, high-carbohydrate, high-fat diet-fed rats supplemented with *Caulerpa lentillifera*.

## Supplementary Tables

**Table S1.** PERMANOVAs based on Bray-Curtis similarity measure for square-root transformed abundances of all rat faecal samples.

| Source           | df | SS     | MS     | Pseudo-F | <i>p</i> (perm) | Unique Perms |
|------------------|----|--------|--------|----------|-----------------|--------------|
| Diet             | 1  | 9115.5 | 9115.5 | 8.8418   | 0.0001          | 9890         |
| Treatment        | 1  | 2845.8 | 2845.8 | 2.7603   | 0.0001          | 9860         |
| Diet × treatment | 1  | 2185.7 | 2185.7 | 2.1201   | 0.0001          | 9849         |
| Res              | 20 | 20619  | 1031   |          |                 |              |
| Total            | 23 | 34766  |        |          |                 |              |

  

| PAIR-WISE TESTS |          |                 |              |
|-----------------|----------|-----------------|--------------|
| Groups          | <i>t</i> | <i>p</i> (perm) | Unique Perms |
| C, CCL          | 1.7178   | 0.0028          | 462          |
| C, H            | 2.4170   | 0.0026          | 462          |
| C, HCL          | 2.2273   | 0.0021          | 462          |
| CCL, H          | 2.5635   | 0.0013          | 462          |
| CCL, HCL        | 2.2596   | 0.0024          | 462          |
| H, HCL          | 1.3972   | 0.0095          | 461          |

*p*-values were calculated using 9,999 permutations under a residual model. C, corn starch diet-fed rats; CCL, corn starch diet-fed rats supplemented with *Caulerpa lentillifera*; H, high-carbohydrate, high-fat diet-fed rats; HCL, high-carbohydrate, high-fat diet-fed rats supplemented with *Caulerpa lentillifera*.

**Table S2.** Correlation between bacterial community structure and physiological parameters ( $p < 0.05$ ).

| Physiological Variables                                            | R <sup>2</sup> | <i>p</i> value |
|--------------------------------------------------------------------|----------------|----------------|
| Oral glucose tolerance test—120-min blood concentration of glucose | 0.76           | 0.001          |
| Liver wet weight                                                   | 0.76           | 0.001          |
| Retroperitoneal fat                                                | 0.74           | 0.001          |
| Epididymal fat                                                     | 0.74           | 0.001          |
| Oral glucose tolerance area under the curve                        | 0.70           | 0.001          |
| Total abdominal fat                                                | 0.69           | 0.001          |
| Kidneys wet weight                                                 | 0.58           | 0.001          |
| Omental fat                                                        | 0.50           | 0.002          |
| Body weight                                                        | 0.47           | 0.002          |
| Water intake                                                       | 0.46           | 0.002          |
| Spleen wet weight                                                  | 0.41           | 0.003          |
| Plasma triglycerides                                               | 0.38           | 0.003          |
| Fat mass                                                           | 0.36           | 0.005          |
| Systolic blood pressure                                            | 0.32           | 0.022          |
| Feed efficiency                                                    | 0.32           | 0.019          |

**Table S3.** Relative abundance of zOTUs affected by diet (ANOVA with  $p$  adjusted <0.05) between C, CCL, H and HCL rats.

| OTU_ID   | C (%) | CCL (%) | H (%) | CL (%) | Phylum         | Family             | Genus                                |
|----------|-------|---------|-------|--------|----------------|--------------------|--------------------------------------|
| Zotu59   | 0.29  | 0.52    | 0.00  | 0.01   | Actinobacteria | Bifidobacteriaceae | <i>Bifidobacterium</i>               |
| Zotu80   | 0.11  | 0.58    | 0.00  | 0.00   | Bacteroidetes  | Muribaculaceae     | unclassified                         |
| Zotu109  | 0.01  | 0.01    | 0.25  | 0.16   | Bacteroidetes  | Muribaculaceae     | unclassified                         |
| Zotu608  | 0.00  | 0.00    | 0.01  | 0.02   | Bacteroidetes  | Muribaculaceae     | unclassified                         |
| Zotu1036 | 0.05  | 0.03    | 0.00  | 0.00   | Bacteroidetes  | Muribaculaceae     | unclassified                         |
| Zotu7    | 2.07  | 3.02    | 0.28  | 0.34   | Bacteroidetes  | Prevotellaceae     | <i>Prevotellaceae</i> UCG-001        |
| Zotu6    | 4.06  | 3.70    | 0.07  | 0.03   | Firmicutes     | Clostridiaceae 1   | <i>Clostridium sensu stricto</i> 1   |
| Zotu540  | 0.00  | 0.00    | 0.02  | 0.04   | Firmicutes     | Lachnospiraceae    | <i>Acetatifactor</i>                 |
| Zotu212  | 0.08  | 0.15    | 0.00  | 0.00   | Firmicutes     | Lachnospiraceae    | <i>Acetitomaculum</i>                |
| Zotu352  | 0.01  | 0.00    | 0.07  | 0.03   | Firmicutes     | Lachnospiraceae    | <i>Blautia</i>                       |
| Zotu510  | 0.00  | 0.00    | 0.03  | 0.04   | Firmicutes     | Lachnospiraceae    | <i>Eisenbergiella</i>                |
| Zotu26   | 1.16  | 0.95    | 0.00  | 0.00   | Firmicutes     | Lachnospiraceae    | <i>Eubacterium ventriosum</i> group  |
| Zotu55   | 0.01  | 0.01    | 0.82  | 0.37   | Firmicutes     | Lachnospiraceae    | <i>Lachnospiraceae</i> NK4A136 group |
| Zotu124  | 0.00  | 0.00    | 0.14  | 0.36   | Firmicutes     | Lachnospiraceae    | <i>Lachnospiraceae</i> NK4A136 group |
| Zotu169  | 0.08  | 0.26    | 0.00  | 0.00   | Firmicutes     | Lachnospiraceae    | <i>Lachnospiraceae</i> NK4A136 group |
| Zotu208  | 0.00  | 0.00    | 0.20  | 0.08   | Firmicutes     | Lachnospiraceae    | <i>Lachnospiraceae</i> NK4A136 group |
| Zotu217  | 0.00  | 0.00    | 0.02  | 0.22   | Firmicutes     | Lachnospiraceae    | <i>Lachnospiraceae</i> NK4A136 group |
| Zotu224  | 0.01  | 0.00    | 0.19  | 0.07   | Firmicutes     | Lachnospiraceae    | <i>Lachnospiraceae</i> NK4A136 group |
| Zotu307  | 0.00  | 0.00    | 0.19  | 0.04   | Firmicutes     | Lachnospiraceae    | <i>Lachnospiraceae</i> NK4A136 group |
| Zotu391  | 0.01  | 0.10    | 0.00  | 0.00   | Firmicutes     | Lachnospiraceae    | <i>Lachnospiraceae</i> NK4A136 group |
| Zotu790  | 0.00  | 0.00    | 0.02  | 0.01   | Firmicutes     | Lachnospiraceae    | <i>Lachnospiraceae</i> NK4A136 group |
| Zotu374  | 0.00  | 0.00    | 0.06  | 0.07   | Firmicutes     | Lachnospiraceae    | <i>Lachnospiraceae</i> UCG-001       |
| Zotu28   | 0.00  | 0.00    | 1.66  | 0.74   | Firmicutes     | Lachnospiraceae    | <i>Lachnospiraceae</i> UCG-006       |
| Zotu204  | 0.00  | 0.00    | 0.29  | 0.07   | Firmicutes     | Lachnospiraceae    | <i>Roseburia</i>                     |
| Zotu248  | 0.00  | 0.00    | 0.17  | 0.09   | Firmicutes     | Lachnospiraceae    | <i>Roseburia</i>                     |
| Zotu548  | 0.00  | 0.00    | 0.02  | 0.04   | Firmicutes     | Lachnospiraceae    | <i>Roseburia</i>                     |
| Zotu36   | 0.00  | 0.00    | 1.16  | 0.27   | Firmicutes     | Lachnospiraceae    | unclassified                         |
| Zotu131  | 0.02  | 0.00    | 0.24  | 0.10   | Firmicutes     | Lachnospiraceae    | unclassified                         |
| Zotu144  | 0.00  | 0.00    | 0.29  | 0.06   | Firmicutes     | Lachnospiraceae    | unclassified                         |
| Zotu286  | 0.00  | 0.00    | 0.13  | 0.05   | Firmicutes     | Lachnospiraceae    | unclassified                         |
| Zotu302  | 0.00  | 0.00    | 0.12  | 0.05   | Firmicutes     | Lachnospiraceae    | unclassified                         |
| Zotu306  | 0.02  | 0.01    | 0.09  | 0.05   | Firmicutes     | Lachnospiraceae    | unclassified                         |
| Zotu354  | 0.00  | 0.01    | 0.10  | 0.03   | Firmicutes     | Lachnospiraceae    | unclassified                         |
| Zotu450  | 0.00  | 0.00    | 0.04  | 0.03   | Firmicutes     | Lachnospiraceae    | unclassified                         |
| Zotu529  | 0.00  | 0.00    | 0.05  | 0.02   | Firmicutes     | Lachnospiraceae    | unclassified                         |
| Zotu592  | 0.00  | 0.00    | 0.02  | 0.04   | Firmicutes     | Lachnospiraceae    | unclassified                         |
| Zotu945  | 0.00  | 0.00    | 0.01  | 0.02   | Firmicutes     | Lachnospiraceae    | unclassified                         |
| Zotu1018 | 0.02  | 0.03    | 0.00  | 0.00   | Firmicutes     | Lachnospiraceae    | unclassified                         |

|         |      |      |      |      |             |                 |                                            |
|---------|------|------|------|------|-------------|-----------------|--------------------------------------------|
| Zotu192 | 0.00 | 0.00 | 0.13 | 0.10 | Firmicutes  | Peptococcaceae  | unclassified                               |
| Zotu288 | 0.00 | 0.01 | 0.05 | 0.10 | Firmicutes  | Peptococcaceae  | unclassified                               |
| Zotu129 | 0.21 | 0.14 | 0.00 | 0.00 | Firmicutes  | Ruminococcaceae | <i>Eubacterium coprostanoligenes</i> group |
| Zotu53  | 0.00 | 0.00 | 0.37 | 0.53 | Firmicutes  | Ruminococcaceae | <i>Ruminiclostridium</i> 6                 |
| Zotu71  | 0.00 | 0.00 | 0.51 | 0.24 | Firmicutes  | Ruminococcaceae | <i>Ruminiclostridium</i> 9                 |
| Zotu158 | 0.00 | 0.00 | 0.17 | 0.11 | Firmicutes  | Ruminococcaceae | <i>Ruminiclostridium</i> 9                 |
| Zotu173 | 0.00 | 0.00 | 0.15 | 0.13 | Firmicutes  | Ruminococcaceae | <i>Ruminiclostridium</i> 9                 |
| Zotu181 | 0.01 | 0.00 | 0.15 | 0.10 | Firmicutes  | Ruminococcaceae | <i>Ruminiclostridium</i> 9                 |
| Zotu33  | 0.94 | 0.38 | 0.00 | 0.00 | Firmicutes  | Ruminococcaceae | <i>Ruminococcaceae</i> NK4A214             |
| Zotu166 | 0.15 | 0.09 | 0.00 | 0.00 | Firmicutes  | Ruminococcaceae | <i>Ruminococcaceae</i> UCG-010             |
| Zotu687 | 0.00 | 0.00 | 0.01 | 0.03 | Firmicutes  | Ruminococcaceae | <i>Ruminococcaceae</i> UCG-013             |
| Zotu170 | 0.00 | 0.00 | 0.17 | 0.12 | Firmicutes  | Ruminococcaceae | <i>Ruminococcaceae</i> UCG-014             |
| Zotu90  | 0.23 | 0.27 | 0.00 | 0.01 | Firmicutes  | Ruminococcaceae | <i>Ruminococcus</i> 1                      |
| Zotu63  | 0.03 | 0.01 | 0.53 | 0.34 | Firmicutes  | Ruminococcaceae | unclassified                               |
| Zotu64  | 0.02 | 0.01 | 0.46 | 0.30 | Firmicutes  | Ruminococcaceae | unclassified                               |
| Zotu65  | 0.52 | 0.25 | 0.00 | 0.00 | Firmicutes  | Ruminococcaceae | unclassified                               |
| Zotu200 | 0.00 | 0.00 | 0.06 | 0.12 | Firmicutes  | Ruminococcaceae | unclassified                               |
| Zotu315 | 0.00 | 0.00 | 0.06 | 0.07 | Firmicutes  | Ruminococcaceae | unclassified                               |
| Zotu358 | 0.01 | 0.01 | 0.06 | 0.07 | Firmicutes  | Ruminococcaceae | unclassified                               |
| Zotu272 | 0.00 | 0.00 | 0.08 | 0.05 | Tenericutes | Mollicutes RF39 | unclassified                               |

Differential abundance analysis was performed using Mvabund. C, corn starch diet-fed rats; CCL, corn starch diet-fed rats supplemented with *Caulerpa lentillifera*; H, high-carbohydrate, high-fat diet-fed rats; HCL, high-carbohydrate, high-fat diet-fed rats supplemented with *Caulerpa lentillifera*.

**Table S4.** Relative abundance of zOTUs affected by treatment (ANOVA with *P* adjusted <0.05) between C, CCL, H and HCL rats.

| OTU_ID   | C (%) | CCL (%) | H (%) | HCL (%) | Phylum        | Family          | Genus        |
|----------|-------|---------|-------|---------|---------------|-----------------|--------------|
| Zotu21   | 0.26  | 1.79    | 0.09  | 0.35    | Bacteroidetes | Muribaculaceae  | unclassified |
| Zotu1204 | 0.00  | 0.02    | 0.00  | 0.01    | Firmicutes    | Lachnospiraceae | unclassified |

Differential abundance analysis was performed using Mvabund. C, corn starch diet-fed rats; CCL, corn starch diet-fed rats supplemented with *Caulerpa lentillifera*; H, high-carbohydrate, high-fat diet-fed rats; HCL, high-carbohydrate, high-fat diet-fed rats supplemented with *Caulerpa lentillifera*.

**Table S5.** Taxonomic assignments of the zOTUs strongly correlated with physiological parameters.

| OTU_ID  | Phylum         | Family             | Genus                                          | Correlation with physiological parameters                                                                                                                                                                                                                                           |
|---------|----------------|--------------------|------------------------------------------------|-------------------------------------------------------------------------------------------------------------------------------------------------------------------------------------------------------------------------------------------------------------------------------------|
| Zotu59  | Actinobacteria | Bifidobacteriaceae | <i>Bifidobacterium</i>                         | Epididymal fat (-), liver wet weight (-), oral glucose tolerance test 120-min concentration (-), oral glucose tolerance test area under the curve (-), retroperitoneal fat (-), total abdominal fat (-)                                                                             |
| Zotu109 | Bacteroidetes  | Muribaculaceae     | unclassified                                   | Epididymal fat (+), kidneys wet weight (+), liver wet weight (+), oral glucose tolerance test 120-minute concentration (+), omental fat (+), retroperitoneal fat (+), spleen wet weight (+), total abdominal fat (+)                                                                |
| Zotu21  | Bacteroidetes  | Muribaculaceae     | unclassified                                   | Oral glucose tolerance test 120-min concentration (-)                                                                                                                                                                                                                               |
| Zotu7   | Bacteroidetes  | Prevotellaceae     | <i>Prevotellaceae</i><br><i>UCG-001</i>        | Liver wet weight (-), oral glucose tolerance test 120-min concentration (-), oral glucose tolerance test area under the curve (-), retroperitoneal fat (-), total abdominal fat (-)                                                                                                 |
| Zotu6   | Firmicutes     | Clostridiaceae 1   | <i>Clostridium sensu stricto 1</i>             | Epididymal fat (-), kidneys wet weight (-), liver wet weight (-), oral glucose tolerance test 120-minute concentration (-), oral glucose tolerance test area under the curve (-), retroperitoneal fat (-), total abdominal fat (-)                                                  |
| Zotu540 | Firmicutes     | Lachnospiraceae    | <i>Acetatifactor</i>                           | Feed efficiency (-), kidneys wet weight (+), liver wet weight (+)                                                                                                                                                                                                                   |
| Zotu212 | Firmicutes     | Lachnospiraceae    | <i>Acetitomaculum</i>                          | Oral glucose tolerance test 120-min concentration (-)                                                                                                                                                                                                                               |
| Zotu352 | Firmicutes     | Lachnospiraceae    | <i>Blautia</i>                                 | Body weight (+), epididymal fat (+), oral glucose tolerance test 120-minute concentration (+), oral glucose tolerance test area under the curve (+), omental fat (+), retroperitoneal fat (+), right ventricle wet weight (+), systolic blood pressure (+), total abdominal fat (+) |
| Zotu510 | Firmicutes     | Lachnospiraceae    | <i>Eisenbergiella</i>                          | Epididymal fat (+), kidneys wet weight (+), liver wet weight (+), omental fat (+), total abdominal fat (+)                                                                                                                                                                          |
| Zotu124 | Firmicutes     | Lachnospiraceae    | <i>Lachnospiraceae</i><br><i>NK4A136 group</i> | Feed efficiency (-), food intake (-), kidneys wet weight (+), liver wet weight (+)                                                                                                                                                                                                  |
| Zotu169 | Firmicutes     | Lachnospiraceae    | <i>Lachnospiraceae</i><br><i>NK4A136 group</i> | Plasma alanine transaminase (+)                                                                                                                                                                                                                                                     |
| Zotu208 | Firmicutes     | Lachnospiraceae    | <i>Lachnospiraceae</i><br><i>NK4A136 group</i> | Epididymal fat (+), oral glucose tolerance test 120-minute concentration (+), oral glucose tolerance test area under the curve (+), retroperitoneal fat (+), right ventricle wet weight (+), total abdominal fat (+)                                                                |
| Zotu217 | Firmicutes     | Lachnospiraceae    | <i>Lachnospiraceae</i><br><i>NK4A136 group</i> | Feed efficiency (-), food intake (-)                                                                                                                                                                                                                                                |

|              |                |                     |                                                |                                                                                                                                                                                                                                                                                               |
|--------------|----------------|---------------------|------------------------------------------------|-----------------------------------------------------------------------------------------------------------------------------------------------------------------------------------------------------------------------------------------------------------------------------------------------|
| Zotu<br>224  | Firmic<br>utes | Lachnos<br>piraceae | <i>Lachnospiraceae</i><br><i>NK4A136 group</i> | Epididymal fat (+), liver wet weight (+), oral glucose tolerance test 120-minute concentration (+), oral glucose tolerance test area under the curve (+), omental fat (+), retroperitoneal fat (+), right ventricle wet weight (+), total abdominal fat (+), plasma triglycerides (+)         |
| Zotu<br>307  | Firmic<br>utes | Lachnos<br>piraceae | <i>Lachnospiraceae</i><br><i>NK4A136 group</i> | Body weight (+), epididymal fat (+), fat mass (+), omental fat (+), retroperitoneal fat (+), spleen wet weight (+), total abdominal fat (+)                                                                                                                                                   |
| Zotu<br>55   | Firmic<br>utes | Lachnos<br>piraceae | <i>Lachnospiraceae</i><br><i>NK4A136 group</i> | Epididymal fat (+), oral glucose tolerance test area under the curve (+), omental fat (+), retroperitoneal fat (+), total abdominal fat (+)                                                                                                                                                   |
| Zotu<br>790  | Firmic<br>utes | Lachnos<br>piraceae | <i>Lachnospiraceae</i><br><i>NK4A136 group</i> | Epididymal fat (+), liver wet weight (+), oral glucose tolerance test 120-minute concentration (+), oral glucose tolerance test area under the curve (+), omental fat (+), retroperitoneal fat (+), right ventricle wet weight (+), total abdominal fat (+)                                   |
| Zotu<br>374  | Firmic<br>utes | Lachnos<br>piraceae | <i>Lachnospiraceae</i><br><i>UCG-001</i>       | Kidneys wet weight (+)                                                                                                                                                                                                                                                                        |
| Zotu<br>28   | Firmic<br>utes | Lachnos<br>piraceae | <i>Lachnospiraceae</i><br><i>UCG-006</i>       | Body weight (+), epididymal fat (+), fat mass (+), plasma non-esterified fatty acids (+), omental fat (+), retroperitoneal fat (+), total abdominal fat (+)                                                                                                                                   |
| Zotu<br>248  | Firmic<br>utes | Lachnos<br>piraceae | <i>Roseburia</i>                               | Body weight (+), epididymal fat (+), fat mass (+), omental fat (+), spleen wet weight (+), total abdominal fat (+)                                                                                                                                                                            |
| Zotu<br>548  | Firmic<br>utes | Lachnos<br>piraceae | <i>Roseburia</i>                               | Feed efficiency (-), kidneys wet weight (+), liver wet weight (+)                                                                                                                                                                                                                             |
| Zotu<br>1018 | Firmic<br>utes | Lachnos<br>piraceae | unclassified                                   | Liver wet weight (-)                                                                                                                                                                                                                                                                          |
| Zotu<br>131  | Firmic<br>utes | Lachnos<br>piraceae | unclassified                                   | Epididymal fat (+), oral glucose tolerance test 120-min concentration (+), oral glucose tolerance test area under the curve (+), omental fat (+), retroperitoneal fat (+), right ventricle wet weight (+), systolic blood pressure (+), total abdominal fat (+)                               |
| Zotu<br>144  | Firmic<br>utes | Lachnos<br>piraceae | unclassified                                   | Body weight (+), epididymal fat (+), fat mass (+), liver wet weight (+), left ventricle + septum wet weight (+), oral glucose tolerance test 120-min concentration (+), omental fat (+), retroperitoneal fat (+), systolic blood pressure (+), spleen wet weight (+), total abdominal fat (+) |
| Zotu<br>286  | Firmic<br>utes | Lachnos<br>piraceae | unclassified                                   | Epididymal fat (+), liver wet weight (+), oral glucose tolerance test 120-min concentration (+), oral glucose tolerance test area under the curve (+), omental fat (+), retroperitoneal fat (+), spleen wet weight (+), total abdominal fat (+), plasma triglycerides (+)                     |
| Zotu<br>302  | Firmic<br>utes | Lachnos<br>piraceae | unclassified                                   | Body weight (+), epididymal fat (+), liver wet weight (+), omental fat (+), retroperitoneal fat (+), total abdominal fat (+)                                                                                                                                                                  |
| Zotu<br>306  | Firmic<br>utes | Lachnos<br>piraceae | unclassified                                   | Liver wet weight (+), oral glucose tolerance test 120-min concentration (+), retroperitoneal fat (+)                                                                                                                                                                                          |
| Zotu<br>354  | Firmic<br>utes | Lachnos<br>piraceae | unclassified                                   | Epididymal fat (+), oral glucose tolerance test 120-min concentration (+), retroperitoneal fat (+), total abdominal fat (+)                                                                                                                                                                   |
| Zotu<br>36   | Firmic<br>utes | Lachnos<br>piraceae | unclassified                                   | Body weight (+), epididymal fat (+), fat mass (+), liver wet weight (+), left ventricle + septum wet weight (+), oral glucose tolerance test 120-min concentration (+), omental fat (+), retroperitoneal fat (+), systolic blood pressure (+), spleen wet weight (+), total abdominal fat (+) |
| Zotu<br>450  | Firmic<br>utes | Lachnos<br>piraceae | unclassified                                   | Oral glucose tolerance test area under the curve (+), right ventricle wet weight (+)                                                                                                                                                                                                          |
| Zotu<br>529  | Firmic<br>utes | Lachnos<br>piraceae | unclassified                                   | Body weight (+), epididymal fat (+), kidneys wet weight (+), liver wet weight (+), oral glucose tolerance test 120-min concentration (+), oral glucose tolerance test area under the curve (+), omental fat (+), retroperitoneal fat (+), spleen wet weight (+), total abdominal fat (+)      |
| Zotu<br>945  | Firmic<br>utes | Lachnos<br>piraceae | unclassified                                   | Spleen wet weight (+)                                                                                                                                                                                                                                                                         |
| Zotu<br>192  | Firmic<br>utes | Peptococ<br>caceae  | unclassified                                   | Epididymal fat (+), retroperitoneal fat (+), total abdominal fat (+)                                                                                                                                                                                                                          |



|             |                 |                     |                                                    |                                                                                                                                                                                                                                                                               |
|-------------|-----------------|---------------------|----------------------------------------------------|-------------------------------------------------------------------------------------------------------------------------------------------------------------------------------------------------------------------------------------------------------------------------------|
| Zotu<br>288 | Firmic<br>utes  | Peptococ<br>caceae  | unclassified                                       | Feed efficiency (-), kidneys wet weight (+), liver wet weight (+)                                                                                                                                                                                                             |
| Zotu<br>129 | Firmic<br>utes  | Ruminoc<br>occaceae | <i>Eubacterium<br/>coprostanoligenes<br/>group</i> | Liver wet weight (-)                                                                                                                                                                                                                                                          |
| Zotu<br>53  | Firmic<br>utes  | Ruminoc<br>occaceae | <i>Ruminiclostridium<br/>6</i>                     | Feed efficiency (-), kidneys wet weight (+), liver wet weight (+), oral glucose tolerance test 120-minute concentration (+), oral glucose tolerance test area under the curve (+)                                                                                             |
| Zotu<br>158 | Firmic<br>utes  | Ruminoc<br>occaceae | <i>Ruminiclostridium<br/>9</i>                     | Body weight (+), epididymal fat (+), liver wet weight (+), oral glucose tolerance test 120-minute concentration (+), omental fat (+), retroperitoneal fat (+), spleen wet weight (+), total abdominal fat (+)                                                                 |
| Zotu<br>173 | Firmic<br>utes  | Ruminoc<br>occaceae | <i>Ruminiclostridium<br/>9</i>                     | Kidneys wet weight (+), liver wet weight (+), oral glucose tolerance test 120-minute concentration (+), oral glucose tolerance test area under the curve (+), plasma triglycerides (+)                                                                                        |
| Zotu<br>181 | Firmic<br>utes  | Ruminoc<br>occaceae | <i>Ruminiclostridium<br/>9</i>                     | Body weight (+), epididymal fat (+), liver wet weight (+), oral glucose tolerance test 120-min concentration (+), omental fat (+), retroperitoneal fat (+), spleen wet weight (+), total abdominal fat (+)                                                                    |
| Zotu<br>71  | Firmic<br>utes  | Ruminoc<br>occaceae | <i>Ruminiclostridium<br/>9</i>                     | Epididymal fat (+), oral glucose tolerance test 120-min concentration (+), oral glucose tolerance test area under the curve (+), omental fat (+), retroperitoneal fat (+), spleen wet weight (+), total abdominal fat (+)                                                     |
| Zotu<br>33  | Firmic<br>utes  | Ruminoc<br>occaceae | <i>Ruminococcaceae<br/>NK4A214 group</i>           | Liver wet weight (-)                                                                                                                                                                                                                                                          |
| Zotu<br>687 | Firmic<br>utes  | Ruminoc<br>occaceae | <i>Ruminococcaceae<br/>UCG-013</i>                 | Kidneys wet weight (+)                                                                                                                                                                                                                                                        |
| Zotu<br>170 | Firmic<br>utes  | Ruminoc<br>occaceae | <i>Ruminococcaceae<br/>UCG-014</i>                 | Oral glucose tolerance test 120-min concentration (+), oral glucose tolerance test area under the curve (+), plasma triglycerides (+)                                                                                                                                         |
| Zotu<br>90  | Firmic<br>utes  | Ruminoc<br>occaceae | <i>Ruminococcus 1</i>                              | Epididymal fat (-), kidneys wet weight (-), liver wet weight (-), oral glucose tolerance test 120-minute concentration (-), oral glucose tolerance test area under the curve (-), omental fat (-), retroperitoneal fat (-), total abdominal fat (-), plasma triglycerides (-) |
| Zotu<br>315 | Firmic<br>utes  | Ruminoc<br>occaceae | unclassified                                       | Epididymal fat (+), kidneys wet weight (+), liver wet weight (+), omental fat (+), retroperitoneal fat (+), spleen wet weight (+), total abdominal fat (+)                                                                                                                    |
| Zotu<br>358 | Firmic<br>utes  | Ruminoc<br>occaceae | unclassified                                       | Epididymal fat (+), feed efficiency (-), kidneys wet weight (+), liver wet weight (+), oral glucose tolerance test 120-min concentration (+), retroperitoneal fat (+), total abdominal fat (+)                                                                                |
| Zotu<br>63  | Firmic<br>utes  | Ruminoc<br>occaceae | unclassified                                       | Epididymal fat (+), liver wet weight (+), oral glucose tolerance test 120-min concentration (+), oral glucose tolerance test area under the curve (+), omental fat (+), retroperitoneal fat (+), total abdominal fat (+)                                                      |
| Zotu<br>64  | Firmic<br>utes  | Ruminoc<br>occaceae | unclassified                                       | Epididymal fat (+), kidneys wet weight (+), liver wet weight (+), oral glucose tolerance test 120-min concentration (+), oral glucose tolerance test area under the curve (+), omental fat (+), retroperitoneal fat (+), total abdominal fat (+)                              |
| Zotu<br>272 | Teneric<br>utes | unclassifi<br>ed    | unclassified                                       | Epididymal fat (+), liver wet weight (+), oral glucose tolerance test 120-minute concentration (+), oral glucose tolerance test area under the curve (+), retroperitoneal fat (+), total abdominal fat (+)                                                                    |

This table includes the physiological parameters that were found to be strongly correlated ( $p < 0.05$ ) with the bacterial community and incorporates OTUs that interact with at least 1 of these parameters ( $n = 49$ ). Plus sign (+) indicates positive correlations, while minus sign (-) indicates negative correlations.
